# Supplementary material for: Estimation of the Cadmium Nephrotoxicity Threshold from Loss of Glomerular Filtration Rate and Albuminuria
Source: MDPI journal article supplement (doi:10.3390/toxics11090755), 2023-09-06
Supplement: s1 [file s1]

# Supplemental Material: Estimation of the Cadmium Nephrotoxicity Threshold from Loss of GFR and Albuminuria

Soisungwan Satarug, David A. Vesey, Tanaporn Khamphaya, Phisit Pouyfung, Glenda C. Gobe, and Supabhorn Yimthiang

Table S1: Predictors of eGFR based on cadmium excretion rate normalized to creatinine excretion

| Independent variables factors                                               | eGFR, mL/min/1.73 m <sup>2</sup> |          |                       |          |                     |          |
|-----------------------------------------------------------------------------|----------------------------------|----------|-----------------------|----------|---------------------|----------|
|                                                                             | All subjects, <i>n</i> = 444     |          | Women, <i>n</i> = 331 |          | Men, <i>n</i> = 112 |          |
|                                                                             | $\beta$                          | <i>p</i> | $\beta$               | <i>p</i> | $\beta$             | <i>p</i> |
| Age, years                                                                  | −0.442                           | <0.001   | −0.449                | <0.001   | −0.408              | <0.001   |
| BMI, kg/m <sup>2</sup>                                                      | −0.043                           | 0.317    | −0.021                | 0.669    | −0.132              | 0.156    |
| Log[(E <sub>Cd</sub> /E <sub>cr</sub> ) × 10 <sup>3</sup> , µg/g creatinine | 0.042                            | 0.435    | 0.044                 | 0.476    | 0.052               | 0.634    |
| SBP, mmHg                                                                   | −0.105                           | 0.073    | −0.084                | 0.213    | −0.162              | 0.186    |
| DBP, mmHg                                                                   | 0.007                            | 0.893    | −0.001                | 0.985    | 0.038               | 0.747    |
| Gender                                                                      | −0.038                           | 0.424    | –                     | –        | –                   | –        |
| Smoking                                                                     | −0.003                           | 0.944    | 0.000095              | 0.998    | −0.002              | 0.980    |
| Diabetes                                                                    | −0.057                           | 0.241    | −0.071                | 0.207    | 0.007               | 0.945    |
| Adjusted R <sup>2</sup>                                                     | 0.282                            | <0.001   | 0.284                 | <0.001   | 0.212               | <0.001   |

eGFR, estimated glomerular filtration rate;  $\beta$ , standardized regression coefficient; adjusted R<sup>2</sup>, coefficient of determination. Coding: male, 1, female, 2; non-smoker, 1, smoker, 2; non-diabetic, 1, diabetic, 2.  $\beta$  indicates strength of association of eGFR with eight independent variables (first column). Adjusted R<sup>2</sup> indicates the proportion of eGFR variance explained by all independent variables. For all tests, *p*-values ≤ 0.05 indicate a statistically significant effect of individual independent variables on eGFR.

Table S2. Predictors of albumin excretion rate normalized to creatinine excretion

| Independent variables/factors                   | Log [(E <sub>alb</sub> /E <sub>cr</sub> ) × 10 <sup>4</sup> , mg/g creatinine |          |                       |          |                     |          |
|-------------------------------------------------|-------------------------------------------------------------------------------|----------|-----------------------|----------|---------------------|----------|
|                                                 | All, <i>n</i> = 473                                                           |          | Women, <i>n</i> = 357 |          | Men, <i>n</i> = 116 |          |
|                                                 | $\beta$                                                                       | <i>p</i> | $\beta$               | <i>p</i> | $\beta$             | <i>p</i> |
| Age, years                                      | 0.012                                                                         | 0.840    | 0.047                 | 0.502    | −0.027              | 0.811    |
| BMI, kg/m <sup>2</sup>                          | 0.036                                                                         | 0.440    | 0.051                 | 0.340    | 0.004               | 0.964    |
| eGFR, mL/min/1.73 m <sup>2</sup>                | −0.092                                                                        | 0.078    | −0.103                | 0.090    | −0.059              | 0.575    |
| Log([Cd] <sub>b</sub> × 10 <sup>3</sup> ), µg/L | 0.136                                                                         | 0.017    | 0.157                 | 0.016    | 0.143               | 0.231    |
| Gender                                          | 0.043                                                                         | 0.399    | –                     | –        | –                   | –        |
| Smoking                                         | 0.017                                                                         | 0.749    | 0.062                 | 0.261    | −0.082              | 0.402    |
| Diabetes                                        | 0.245                                                                         | <0.001   | 0.214                 | <0.001   | 0.355               | 0.002    |
| Hypertension                                    | 0.163                                                                         | <0.001   | 0.158                 | 0.003    | 0.171               | 0.069    |
| Adjusted R <sup>2</sup>                         | 0.092                                                                         | <0.001   | 0.084                 | <0.001   | 0.103               | 0.008    |

$\beta$ , standardized regression coefficient; eGFR, estimated glomerular filtration rate; adjusted  $R^2$ , coefficient of determination. Coding: male, 1, female, 2; non-smoker, 1, smoker, 2; non-diabetic, 1, diabetic, 2.  $\beta$  indicates strength of association of  $\log[(E_{alb}/C_{cr} \times 10^4)]$  with eight independent variables (first column). Adjusted  $R^2$  indicates the proportion of  $\log[(E_{alb}/E_{cr} \times 10^4)]$  variance explained by all independent variables. For all tests,  $p$ -values  $\leq 0.05$  indicate a statistically significant effect of individual independent variables on  $\log[(E_{alb}/E_{cr} \times 10^4)]$ .

Table S3. Prevalence odds ratios for low eGFR and albuminuria in relation to cadmium excretion rate normalized to creatine excretion

| Independent variables      | Low eGFR             |        | Albuminuria          |        |
|----------------------------|----------------------|--------|----------------------|--------|
|                            | POR (95% CI)         | $p$    | POR (95% CI)         | $p$    |
| Age, years                 | 1.129 (1.071, 1.189) | <0.001 | 1.027 (0.991, 1.064) | 0.147  |
| BMI, kg/m <sup>2</sup>     | 1.018 (0.923, 1.122) | 0.725  | 1.040 (0.972, 1.114) | 0.256  |
| Gender                     | 2.106 (0.587, 7.555) | 0.253  | 0.539 (0.263, 1.104) | 0.091  |
| Smoking                    | 1.532 (0.485, 4.842) | 0.468  | 0.918 (0.435, 1.939) | 0.823  |
| Diabetes                   | 3.054 (1.147, 8.132) | 0.025  | 4.861 (2.303, 1.939) | <0.001 |
| Hypertension               | 1.239 (0.545, 2.818) | 0.609  | 2.080 (1.170, 3.697) | 0.013  |
| Tertile of $E_{Cd}/E_{cr}$ |                      |        |                      |        |
| Low                        | Referent             |        | Referent             |        |
| Middle                     | 4.596 (1.271, 16.61) | 0.020  | 1.875 (0.901, 3.905) | 0.093  |
| High                       | 3.964 (1.176, 13.36) | 0.026  | 1.807 (0.810, 4.033) | 0.149  |

POR, prevalence odds ratio; CI, confidence interval; BMI, body mass index; eGFR, estimated glomerular filtration rate. Albuminuria was defined as albumin to creatinine ratios (ACR)  $\geq 20$  mg/g for men and  $\geq 30$  mg/g for women. Coding, male 1, female 2; non-smoker 1, smoker 2; non-diabetic 1, diabetic 2; code 1 is referent. Data were generated from logistic regression relating POR for low eGFR and albuminuria to seven independent variables (first column). The cut-off values of  $E_{Cd}/E_{cr}$  for the low, middle and high tertiles of Cd burden in men were  $\leq 1.41$ , 1.42–3.57,  $\geq 3.58$   $\mu\text{g/g}$  creatinine, respectively. Corresponding cut-off values of  $E_{Cd}/E_{cr}$  in women were  $\leq 1.97$ , 1.98–4.59,  $\geq 4.60$   $\mu\text{g/g}$  creatinine. For men, arithmetic means (SD) of  $E_{Cd}/E_{cr}$  in low, middle and high tertiles were 0.40 (0.50), 2.37 (0.66) and 7.07 (4.11)  $\mu\text{g/g}$  creatinine, respectively. For women, arithmetic means (SD) of  $E_{Cd}/E_{cr}$  in low, middle and high tertiles were 0.49 (0.62), 3.24 (0.78) and 9.06 (4.96)  $\mu\text{g/g}$  creatinine, respectively. Respective numbers of men (women) in low, middle and high  $E_{Cd}/E_{cr}$  tertiles were 37 (110), 39 (111) and 38 (113). For all tests,  $p$ -values  $\leq 0.05$  indicate a statistically significant effect of individual independent variables to the POR for low eGFR and albuminuria.
